# Supplementary material
Source: MDPI journal article supplement (https://www.mdpi.com/2073-4344/13/12/1468)
Supplement: s1 [file s1]

## Supplementary File

### Nickel-Iron Alloy Nanoparticle-Modified Carbon Fibre and Nickel-Coated Carbon Fibre Catalyst Materials for Hydrogen and Oxygen Evolution Reactions in 0.1 M NaOH Solution

Mateusz Kuczyński, Tomasz Mikołajczyk\*, Bogusław Pierożyński

Department of Chemistry, Faculty of Agriculture and Forestry, University of Warmia and Mazury in Olsztyn, Łódzki Square 4, 10-727 Olsztyn, Poland

\*Corresponding author: Tomasz Mikołajczyk; Phone: +48 89 523-4177; Fax: +48 89 523-4801; E-mail address: tomasz.mikolajczyk@uwm.edu.pl;

#### Abstract

This study presents the results of electrochemical investigations on Hydrogen and Oxygen Evolution Reactions (HER and OER), conducted on commercially available carbon fibres and nickel-coated carbon fibres modified with nanoscale NiFe alloy particles in 0.1 M NaOH solution. The obtained results demonstrated enhanced catalytic activity of the NiFe-modified fibre materials, with approximately 14,700% and 25% improvement in the OER and HER activity (respectively), as compared to unmodified electrodes. The catalytic properties were evaluated by means of electrochemical impedance spectroscopy, Tafel polarisation and cyclic, and linear voltammetry techniques. The deposited particles' distribution and quantities present on the investigated materials were analysed using Scanning Electron Microscopy (SEM) and Energy-Dispersive X-Ray spectroscopy (EDX) methods. These findings provided valuable insights into electrochemical, catalytic performance of NiFe-modified carbon fibre/nickel-coated carbon fibre materials, simultaneously highlighting their potential application as catalyst materials for electrodes in industrial-scale water electrolyzers.

The purpose of this supplementary file is to provide additional data, analyses and methodological details that complement the findings presented in the main manuscript. Expanded data sets include cyclic voltammetry and impedance measurements, particularly those normalized to electrochemically active surface area (ECSA).

To accurately determine the ECSA of all electrodes, we utilized potential sweep measurements to calculate the double-layer capacitance. These sweeps were conducted at a potential centred around 0.7 V vs. RHE, within a range of  $\pm 0.10$  V of this central potential. The sweep-rates for these measurements varied between 5 and 100 mV/s.

#### Calculation of Differential Capacitance

For the calculation of the differential capacitance  $C_{DL}$ , two basic equations are employed:

$$C_{DL} = \frac{DQ}{D\varphi} \quad \text{Equation (1)}$$

$$i = \frac{dQ(\varphi)}{dt} \quad \text{Equation (2)}$$

Here,  $C_{DL}$  represents the double-layer capacitance,  $Q$  is the charge,  $\varphi$  is the potential, and  $i$  is the current.

From Equations (1) and (2), the following relationship is derived:

$$i = C_{DL} \frac{d\varphi}{dt} \quad \text{Equation (3)}$$

The calculated current densities as a function of the scan rate demonstrated linear behaviour over the measured range (see Figure S1) [1].

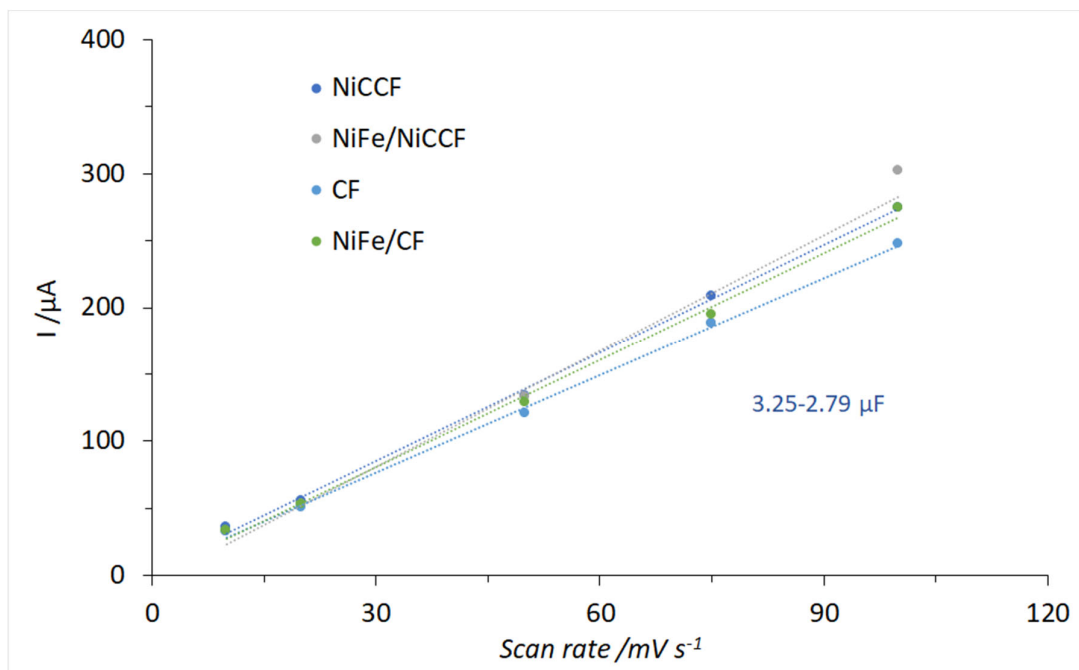

**Figure S1.** Average current densities measured at the potential of 0.7 V vs. RHE, plotted as a function of scan rate. The slope of the linear fit gives the double-layer capacitance.

The average ECSA of all electrodes was estimated to be approximately  $0.15 \text{ cm}^2$  based on the double-layer capacitance measurements, in reference to that commonly used value of  $20 \text{ } \mu\text{F cm}^{-2}$  in literature for smooth and homogeneous surfaces [2]. The electrochemical parameters presented in this supplementary file were calculated using this average ECSA.

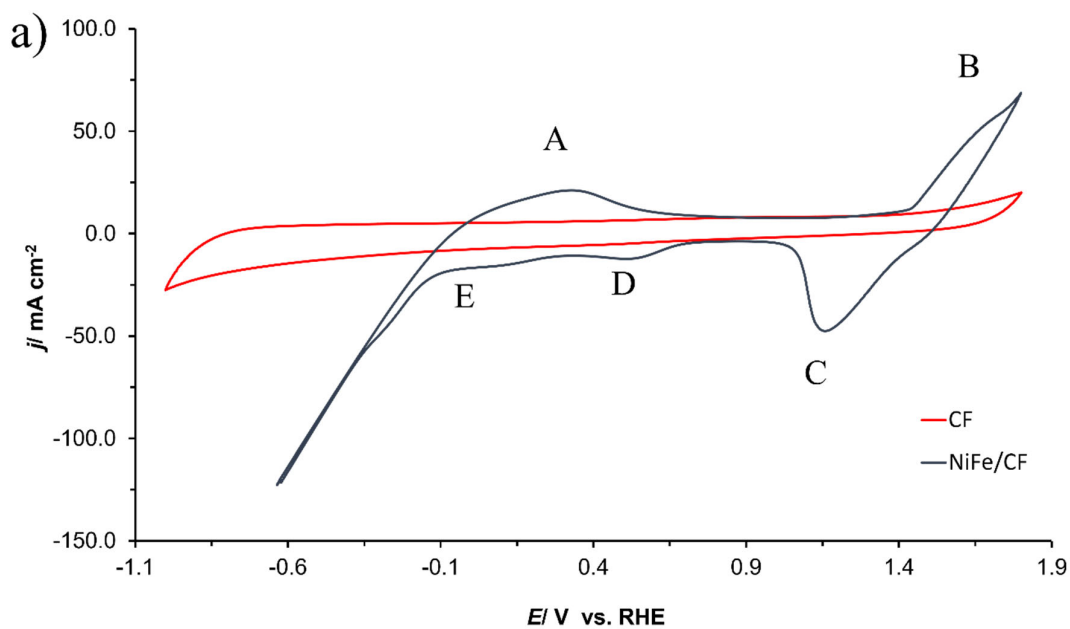

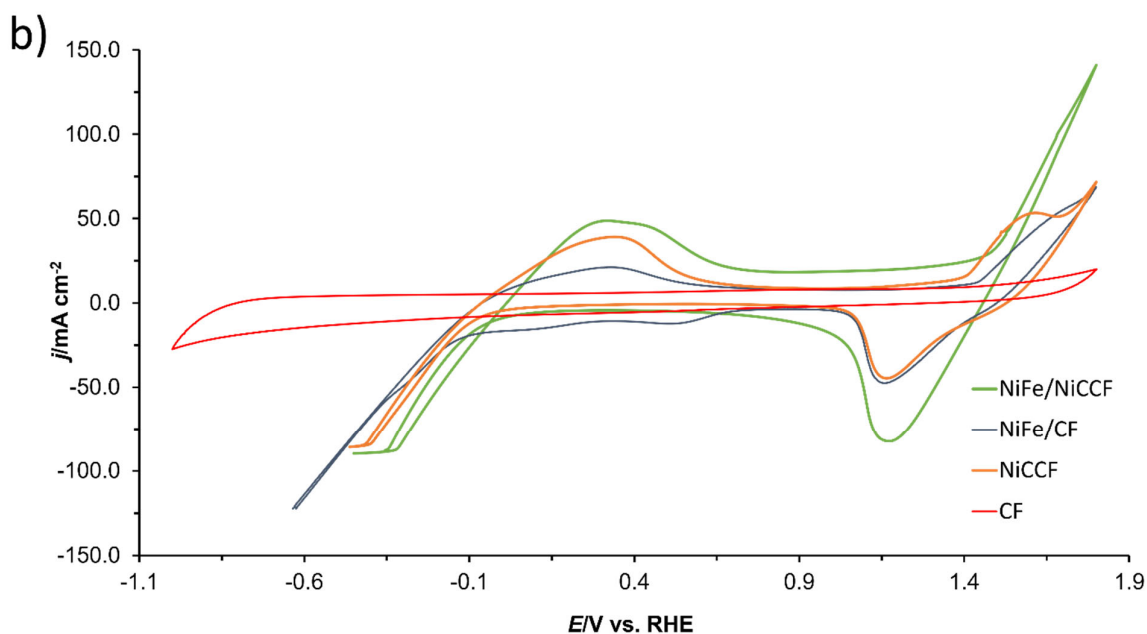

**Figure S2.** Cyclic voltammogram curves of (a) CF and NiFe/CF; (b) CF, NiCCF, NiFe/CF and NiFe/NiCCF electrodes in contact with 0.1 M NaOH medium, carried-out at a scan-rate of 50 mV s<sup>-1</sup> for the potential span from -1.0 to 1.8 V vs. RHE.

The current densities in the main manuscript based on the geometrical surface area (GSA), which came to ca. -0.5 and 0.3 mA/cm<sup>2</sup> at -0.6 and 1.8 V vs RHE, respectively, for NiFe/CF catalyst compared to existing literature [3] values of ca. -15 and 15 mA/cm<sup>2</sup> for similar potentials are notably smaller. This discrepancy stems from our initial reliance on the manufacturer-provided surface areas for both CF and NiCCF materials. However, the electrochemically active surface area (ECSA) was found to be approximately 300 times smaller, and it was observed that the parameters based on the ECSA seemed overly optimistic, reaching values of -125 and 75 mA/cm<sup>2</sup> for NiFe/CF electrode at the corresponding potentials. Additionally, the unmodified CF reached a value of about -16 mA/cm<sup>2</sup>, which also causes some dissonance with the results available in the literature.

**Table S1.** Current densities for HER ( $\eta=0.35$  V) and OER ( $\eta=0.57$  V) recorded from CV curves.

| Sample     | Current densities [mA cm <sup>-2</sup> ] |                   |
|------------|------------------------------------------|-------------------|
|            | HER $\eta=0.35$ V                        | OER $\eta=0.57$ V |
| CF         | -10.9                                    | 20.0              |
| NiFe/CF    | -57.7                                    | 68.6              |
| NiCCF      | -72.5                                    | 72.8              |
| NiFe/NiCCF | -88.6                                    | 142.8             |

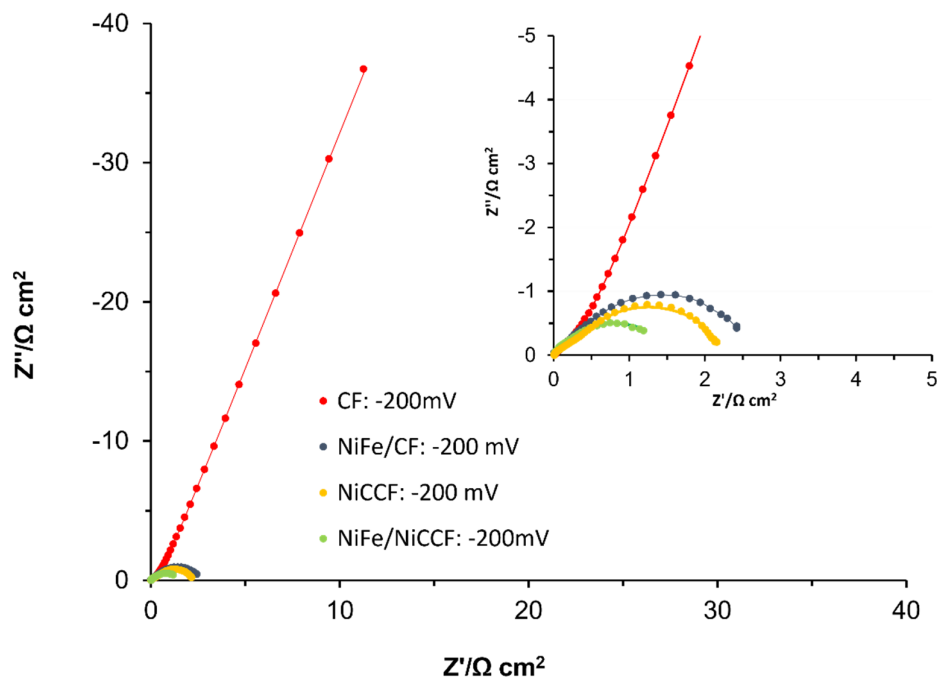

**Figure S3.** Electrochemical impedance Nyquist plots for the HER on CF, NiCCF, NiFe/CF and NiFe/NiCCF electrode surfaces in contact with 0.1 M NaOH (at 293K) for the potential of -200 mV vs. RHE.

**Table S2.** Exchange current densities for the HER (calculated based on the Butler-Volmer equation) in 0.1 M NaOH.

| Material   | HER                    |           |
|------------|------------------------|-----------|
|            | $j_0$ [ $A\ cm^{-2}$ ] | Ref.      |
| CF         | $4.7 \times 10^{-9}$   | This work |
| NiFe/CF    | $4.4 \times 10^{-4}$   | This work |
| NiCCF      | $4.0 \times 10^{-4}$   | This work |
| NiFe/NiCCF | $4.8 \times 10^{-4}$   | This work |
| Ru/NiCCF   | $5.4 \times 10^{-5}$   | [4]       |
| Pd/CF      | $1.7 \times 10^{-5}$   | [5]       |
| Ru/CF      | $7.7 \times 10^{-6}$   | [6]       |

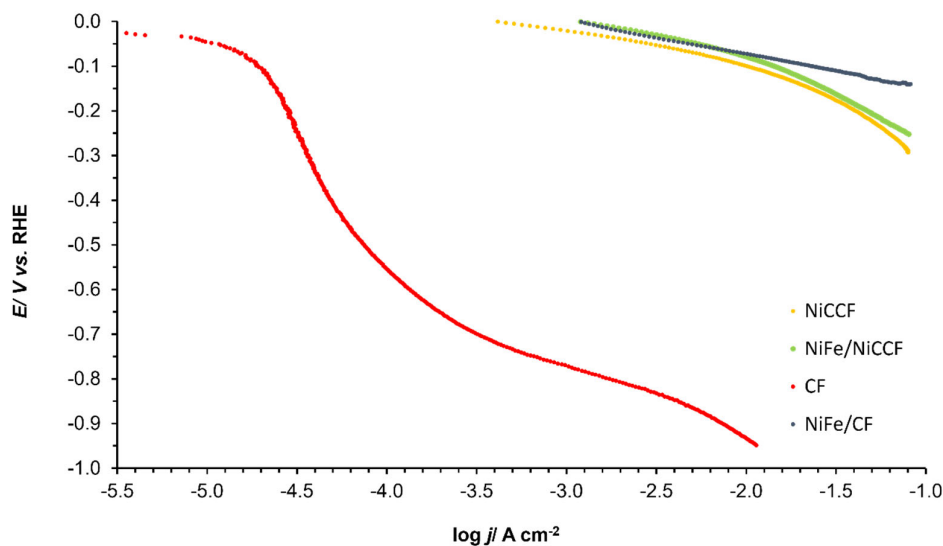

**Figure S4.** Quasi-potentiostatic cathodic polarisation curves for the hydrogen evolution reaction (HER), obtained at CF, NiFe/CF, NiCCF, and NiFe/NiCCF electrodes in 0.1 M NaOH electrolyte. The polarisation curves were recorded at a scan rate of 0.5 mV s<sup>-1</sup>. The impedance-based solution resistance, *iR* correction was also applied.

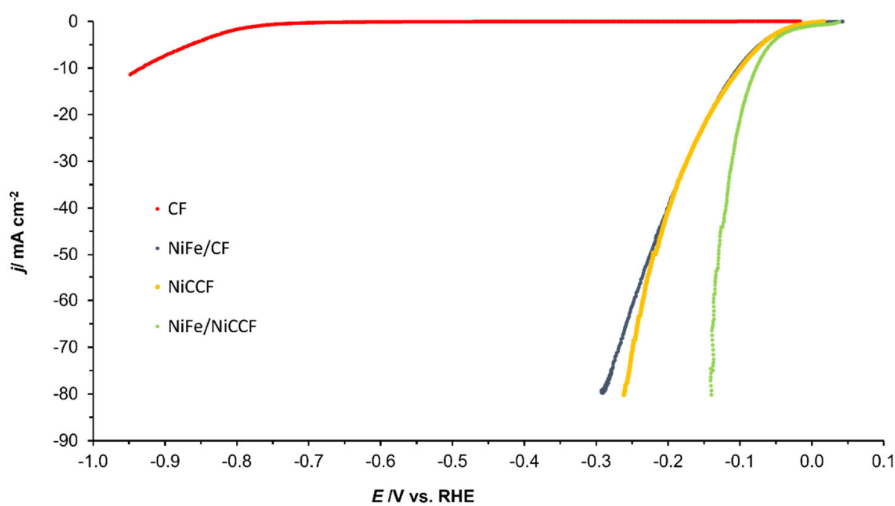

**Figure S5.** Linear Sweep Voltammetry (LSV) curves of CF, NiFe/CF, NiCCF and NiFe/NiCCF electrodes in 0.1 M NaOH solution, carried out with a scan rate of 0.5 mV s<sup>-1</sup> for the HER.

**Table S3.** HER kinetic parameters for the selected catalytic materials.

| Material   | $b_c$ [mV dec <sup>-1</sup> ] | $j_0$ [A cm <sup>-2</sup> ] | Ref.      | Electrolyte |
|------------|-------------------------------|-----------------------------|-----------|-------------|
| CF         | -108                          | $8.1 \times 10^{-11}$       | This work | 0.1 M NaOH  |
| NiFe/CF    | -62                           | $4.4 \times 10^{-4}$        | This work | 0.1 M NaOH  |
| NiCCF      | -63                           | $4.3 \times 10^{-4}$        | This work | 0.1 M NaOH  |
| NiFe/NiCCF | -67                           | $3.4 \times 10^{-4}$        | This work | 0.1 M NaOH  |

|             |      |                      |      |            |
|-------------|------|----------------------|------|------------|
| NiFe/NiFoam | 157  | $1.7 \times 10^{-5}$ | [7]  | 1.0 M KOH  |
| Ni          | -    | $2.3 \times 10^{-6}$ | [8]  | 0.1 M NaOH |
| Pt          | -150 | $1.0 \times 10^{-5}$ | [9]  | 0.1 M NaOH |
| NiSn/Cu     | -121 | $6.9 \times 10^{-7}$ | [3]  | 1.0 M KOH  |
| NiCoSn/Cu   | -122 | $1.2 \times 10^{-5}$ | [3]  | 1.0 M KOH  |
| NiCu/C      | -57  | $2.5 \times 10^{-5}$ | [10] | 1.0 M KOH  |

The ECSA-normalized values for HER performance (Tables S2 and S3) were significantly higher than those for conventional nickel [8] and even platinum [9] electrodes. While this could potentially point to an exceptionally high density of active sites, these results appeared somewhat overly optimistic.

To provide a more balanced and rigorous assessment, we decided to adopt a dual approach by reporting electrochemical parameters based on the geometrical surface area (GSA) in the main manuscript and the ECSA in the supplementary file. This methodology allows us to present a more comprehensive view of the electrochemical performance of our NiFe/CF and NiFe/NiCCF electrodes. Using GSA as a basis offers a conservative comparison with established materials, such as nickel and platinum, while the ECSA-based parameters highlight the potential for optimization and the intrinsic activity of our modified electrodes.

By employing this dual approach, we aim to facilitate a more subtle interpretation of our results and to allow for more robust comparisons with other studies in the field of HER catalysis.

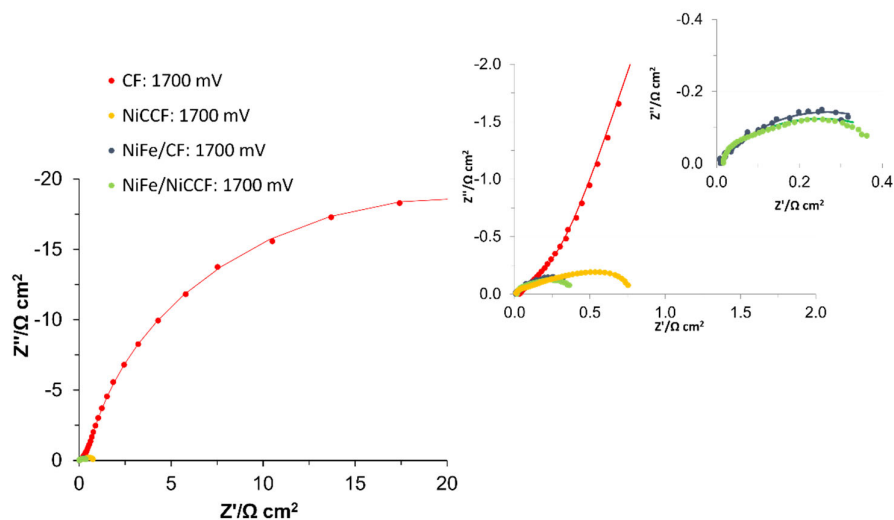

**Figure S6.** Electrochemical Nyquist impedance plots for the OER on CF, NiCCF, NiFe/CF and NiFe/NiCCF electrode surfaces in contact with 0.1 M NaOH solution (at 293K) for the potential of 1700 mV vs. RHE.

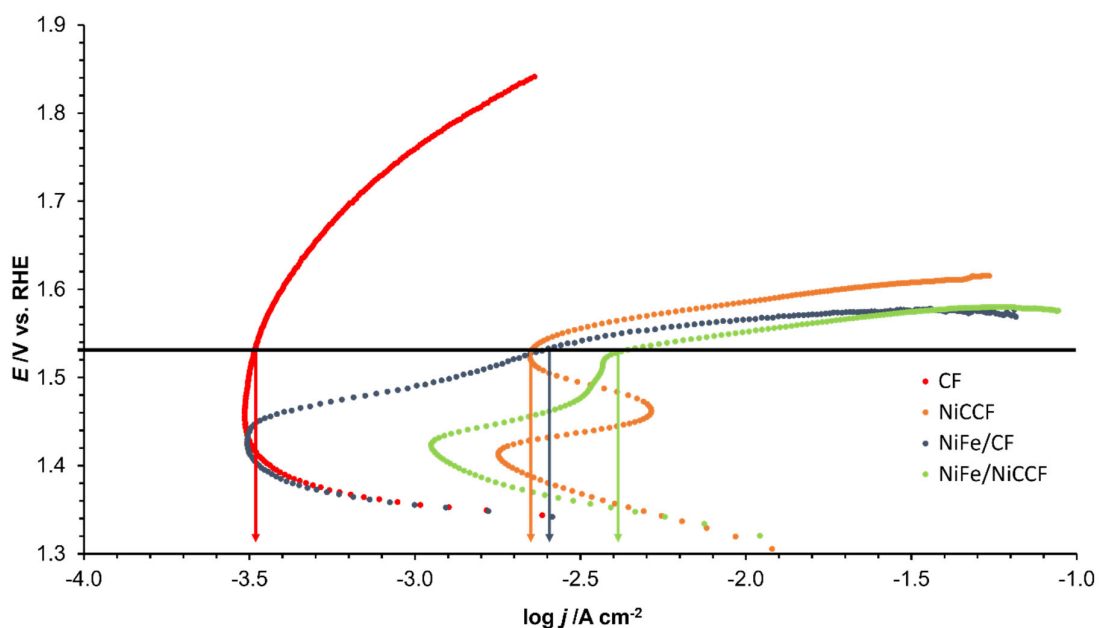

**Figure S7.** Quasi-potentiostatic cathodic polarisation curves for the oxygen evolution reaction (OER) obtained for CF, NiFe/CF, NiCCF and NiFe/NiCCF electrodes in 0.1 M NaOH solution. The polarisation curves were recorded at a scan rate of  $0.5 \text{ mV s}^{-1}$ . The black line represents the overpotential of 300 mV. Arrows on the graph show the logarithm of the current density ( $\log j$ ) for each sample; the colour of the arrow matches the colour of the corresponding sample plot. The  $iR$  correction was applied to account for the solution resistance, based on the impedance measurements.

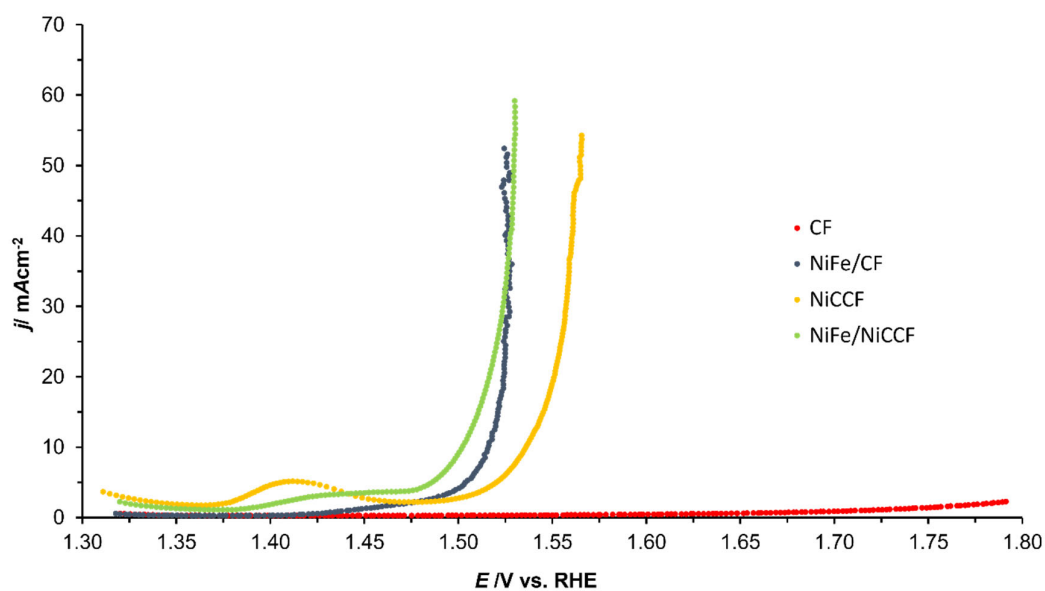

**Figure S8.** Linear Sweep Voltammetry (LSV) curves of CF, NiFe/CF, NiCCF and NiFe/NiCCF electrodes in 0.1 M NaOH solution, carried-out with a scan rate of  $0.5 \text{ mV s}^{-1}$  for the OER.



**Table S4.** OER kinetic parameters for the selected catalytic materials.

| Material                                             | Electrolyte | $b_a$ [mV dec <sup>-1</sup> ] | $j_{(\eta=0.3\text{ V})}$ [A cm <sup>-2</sup> ] | $\eta_{(j=10\text{ mA cm}^{-2})}$ [mV] | Ref.      |
|------------------------------------------------------|-------------|-------------------------------|-------------------------------------------------|----------------------------------------|-----------|
| CF                                                   | 0.1 M NaOH  | 261                           | $2.5 \times 10^{-3}$                            | 560                                    | This work |
| NiFe/CF                                              | 0.1 M NaOH  | 40                            | $2.4 \times 10^{-2}$                            | 290                                    | This work |
| NiCCF                                                | 0.1 M NaOH  | 74                            | $1.1 \times 10^{-2}$                            | 305                                    | This work |
| NiFe/NiCCF                                           | 0.1 M NaOH  | 60                            | $4.9 \times 10^{-2}$                            | 270                                    | This work |
| RuO <sub>2</sub> /GC                                 | 0.1 M NaOH  | 44                            | $\sim 5.0 \times 10^{-4}$                       | -                                      | [11]      |
| Co <sub>3</sub> O <sub>4</sub> /GC                   | 0.1 M KOH   | 69                            | $5.9 \times 10^{-6}$                            | -                                      | [12]      |
| CoAl <sub>2</sub> O <sub>4</sub> /GC                 | 0.1 M KOH   | 56                            | $3.9 \times 10^{-7}$                            | -                                      | [12]      |
| ZnCo <sub>2</sub> O <sub>4</sub> /GC                 | 0.1 M KOH   | 113                           | $5.6 \times 10^{-7}$                            | -                                      | [12]      |
| Pt                                                   | 1.0 M KOH   | 66                            | $4.0 \times 10^{-4}$                            | -                                      | [13]      |
| Ni/Fe                                                | 1.0 M NaOH  | 38                            | $3.3 \times 10^{-5}$                            | -                                      | [14]      |
| Co/Fe                                                | 1.0 M NaOH  | 46                            | $1.2 \times 10^{-5}$                            | -                                      | [14]      |
| IrO <sub>2</sub> /GC                                 | 1.0 M KOH   | 76                            | $3.9 \times 10^{-3}$                            | -                                      | [15]      |
| CoP/C                                                | 1.0 M KOH   | 71                            | $5.0 \times 10^{-3}$                            | -                                      | [15]      |
| NiFe-LDH/GC                                          | 1.0 M KOH   | 35                            | $\sim 9.0 \times 10^{-4}$                       | 320                                    | [16]      |
| Ni <sub>0.25</sub> Co <sub>0.75</sub> O <sub>x</sub> | 1.0 M KOH   | 36                            | $7.9 \times 10^{-5}$                            | 377                                    | [17]      |
| NiCo-LDH/GC                                          | 1.0 M KOH   | 41                            | -                                               | 335                                    | [18]      |
| MnFe <sub>2</sub> O <sub>4</sub> /GC                 | 0.1 M KOH   | 114                           | -                                               | 470                                    | [19]      |
| NiFe <sub>2</sub> O <sub>4</sub> /GC                 | 0.1 M KOH   | 98                            | -                                               | 440                                    | [19]      |

The current density values recorded on the examined materials at an anodic overpotential of 300 mV were superior to those achieved by bulk NiFe-LDH (Layered Double Hydroxide) materials [18]. Moreover, the NiFe-modified CF and NiCCF electrodes exhibited higher current densities than certain other catalytic materials, such as IrO<sub>2</sub> or CoP.

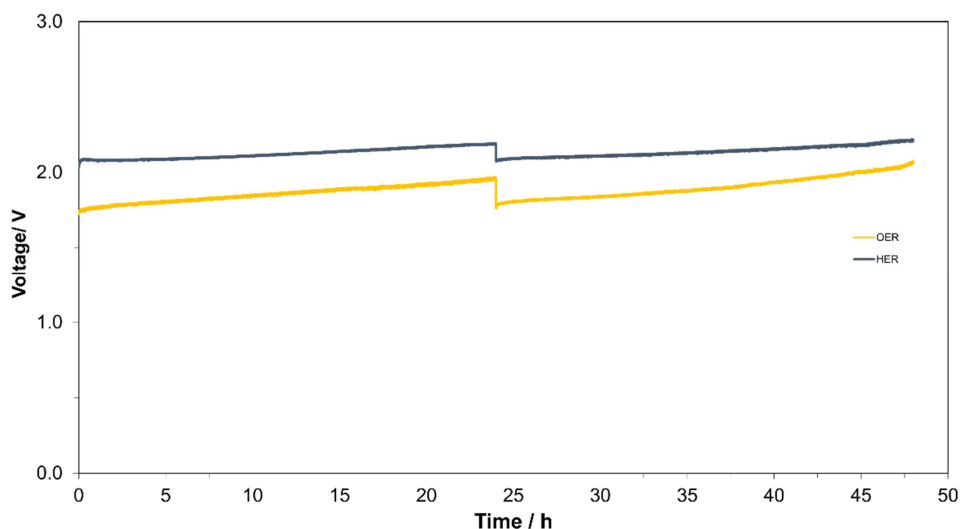

**Figure S9.** Long-term electrochemical stability tests of NiFe alloy on the CF were conducted at a current density of  $15 \text{ mA cm}^{-2}$ . The system consisted of a NiFe/CF working electrode and a Ti/Pt counter electrode.

**Table S5.** Composition of electrodeposition baths and process parameters to prepare *ca.* 10 wt. % of NiFe alloy deposits

| Reagents                                                                              | Concentration (M) | Process parameters                                                                                                                                |
|---------------------------------------------------------------------------------------|-------------------|---------------------------------------------------------------------------------------------------------------------------------------------------|
| $\text{NiSO}_4 \times 6 \text{ H}_2\text{O}$ (9.0%, Sigma Aldrich, SaInt. Louis, USA) | 0.48              | Anode: Pt foil<br>Cathode: CF/NiCCF<br>Temperature: 313 K<br>Deposition time: 15 s<br>Current-density: $1 \text{ mA cm}^{-2}$<br>Solution pH: 3.0 |
| $\text{NiCl}_2 \times 6 \text{ H}_2\text{O}$ (98%, POCH, Gliwice, Poland)             | 0.58              |                                                                                                                                                   |
| $\text{H}_3\text{BO}_3$ (>99.5%, POCH, Gliwice, Poland)                               | 0.73              |                                                                                                                                                   |
| $\text{FeSO}_4 \times 7 \text{ H}_2\text{O}$ (99%, AKTYN, Suchy Las, Poland)          | 0.07              |                                                                                                                                                   |

## References

1. Connor P, Schuch J, Kaiser B, Jaegermann W. The Determination of Electrochemical Active Surface Area and Specific Capacity Revisited for the System  $\text{MnO}_x$  as an Oxygen Evolution Catalyst. *Z Für Phys Chem* **2020**, 234, 979–994. <https://doi.org/10.1515/zpch-2019-1514>.
2. Lasia A. Mechanism and kinetics of the hydrogen evolution reaction. *Int. J. Hydrog. Energy* **2019**, 44, 19484–19518. <https://doi.org/10.1016/j.ijhydene.2019.05.183>.
3. Vijayakumar J, Mohan S, Anand Kumar S, Suseendiran SR, Pavithra S. Electrodeposition of Ni–Co–Sn alloy from choline chloride-based deep eutectic solvent and characterization as cathode for hydrogen evolution in alkaline solution. *Int. J. Hydrog. Energy* **2013**, 38, 10208–10214. <https://doi.org/10.1016/j.ijhydene.2013.06.068>.

4. Pierożyński B, Mikołajczyk T. Hydrogen evolution reaction at Ru-modified nickel-coated carbon fibre in 0.1 M NaOH. *Pol. J. Chem. Technol.* **2015**, 17, 18–22. <https://doi.org/10.1515/pjct-2015-0004>.
5. Pierozynski B, Mikołajczyk T, Turemko M, Czerwosz E, Kozłowski M. Hydrogen evolution reaction at Pd-modified carbon fibre in 0.1 M NaOH. *Int. J. Hydrog. Energy* **2015**, 40, 1795–1799. <https://doi.org/10.1016/j.ijhydene.2014.12.029>.
6. Mikołajczyk T, Pierozynski B. Influence of Electrochemical Oxidation of Carbon Fibre on Cathodic Evolution of Hydrogen at Ru-Modified Carbon Fibre Material Studied in 0.1 M NaOH. *Int. J. Electrochem. Sci.* **2013**, 8.
7. Wang M, Wang J-Q, Xi C, Cheng C-Q, Kuai C-G, Zheng X-L, et al. Valence-State Effect of Iridium Dopant in NiFe(OH)<sub>2</sub> Catalyst for Hydrogen Evolution Reaction. *Small* **2021**, 17, 2100203. <https://doi.org/10.1002/smll.202100203>.
8. Zhou Z, Liu Y, Zhang J, Pang H, Zhu G. Non-precious nickel-based catalysts for hydrogen oxidation reaction in alkaline electrolyte. *Electrochem. Commun.* **2020**, 121, 106871. <https://doi.org/10.1016/j.elecom.2020.106871>.
9. Zheng Y, Jiao Y, Vasileff A, Qiao S-Z. The Hydrogen Evolution Reaction in Alkaline Solution: From Theory, Single Crystal Models, to Practical Electrocatalysts. *Angew. Chem. Int. Ed.* **2018**, 57, 7568–7579. <https://doi.org/10.1002/anie.201710556>.
10. Gao MY, Yang C, Zhang QB, Yu YW, Hua YX, Li Y, et al. Electrochemical fabrication of porous Ni-Cu alloy nanosheets with high catalytic activity for hydrogen evolution. *Electrochimica Acta* **2016**, 215, 609–616. <https://doi.org/10.1016/j.electacta.2016.08.145>.
11. Reier T, Oezaslan M, Strasser P. Electrocatalytic Oxygen Evolution Reaction (OER) on Ru, Ir, and Pt Catalysts: A Comparative Study of Nanoparticles and Bulk Materials. *ACS Catal* **2012**, 2, 1765–1772. <https://doi.org/10.1021/cs3003098>.
12. Wang H-Y, Hung S-F, Chen H-Y, Chan T-S, Chen HM, Liu B. In Operando Identification of Geometrical-Site-Dependent Water Oxidation Activity of Spinel Co<sub>3</sub>O<sub>4</sub>. *ACS Publ* **2015**. <https://doi.org/10.1021/jacs.5b10525>.
13. Cui X, Zhang B, Zeng C, Guo S. Electrocatalytic activity of high-entropy alloys toward oxygen evolution reaction. *MRS Commun.* **2018**, 8, 1230–1235. <https://doi.org/10.1557/mrc.2018.111>.
14. Lyons MEG, Brandon MP. The Oxygen Evolution Reaction on Passive Oxide Covered Transition Metal Electrodes in Alkaline Solution. *Part III – Iron. Int. J Electrochem Sci* **2008**, 3.
15. Chang J, Xiao Y, Xiao M, Ge J, Liu C, Xing W. Surface Oxidized Cobalt-Phosphide Nanorods As an Advanced Oxygen Evolution Catalyst in Alkaline Solution. *ACS Catal* **2015**, 5, 6874–6878. <https://doi.org/10.1021/acscatal.5b02076>.
16. Gong M, Li Y, Wang H, Liang Y, Wu JZ, Zhou J, et al. An Advanced Ni-Fe Layered Double Hydroxide Electrocatalyst for Water Oxidation. *J. Am. Chem. Soc.* **2013**, 135, 8452–8455. <https://doi.org/10.1021/ja4027715>.
17. Song F, Hu X. Exfoliation of layered double hydroxides for enhanced oxygen evolution catalysis. *Nat. Commun.* **2014**, 5, 4477. <https://doi.org/10.1038/ncomms5477>.
18. Suen N-T, Hung S-F, Quan Q, Zhang N, Xu Y-J, Chen HM. Electrocatalysis for the oxygen evolution reaction: recent development and future perspectives. *Chem. Soc. Rev.* **2017**, 46, 337–365. <https://doi.org/10.1039/C6CS00328A>.
19. Li M, Xiong Y, Liu X, Bo X, Zhang Y, Han C, et al. Facile synthesis of electrospun MFe<sub>2</sub>O<sub>4</sub> (M = Co, Ni, Cu, Mn) spinel nanofibers with excellent electrocatalytic properties for oxygen evolution and hydrogen peroxide reduction. *Nanoscale* **2015**, 7, 8920–8930. <https://doi.org/10.1039/C4NR07243J>.
